# Supplementary material
Source: MDPI journal article supplement (https://www.mdpi.com/search?q=toxins-13-00265)
Supplement: s001 [file toxins-13-00265-s001.pdf]

## Supplementary Materials: Degradation of Multiple Peptides by Microcystin-Degrader *Paucibacter toxinivorans* (2C20)

Allan A. Santos, Sylvia Soldatou, Valeria Freitas de Magalhães, Sandra M. F. O. Azevedo, Dolores Camacho-Muñoz, Linda A. Lawton and Christine Edwards

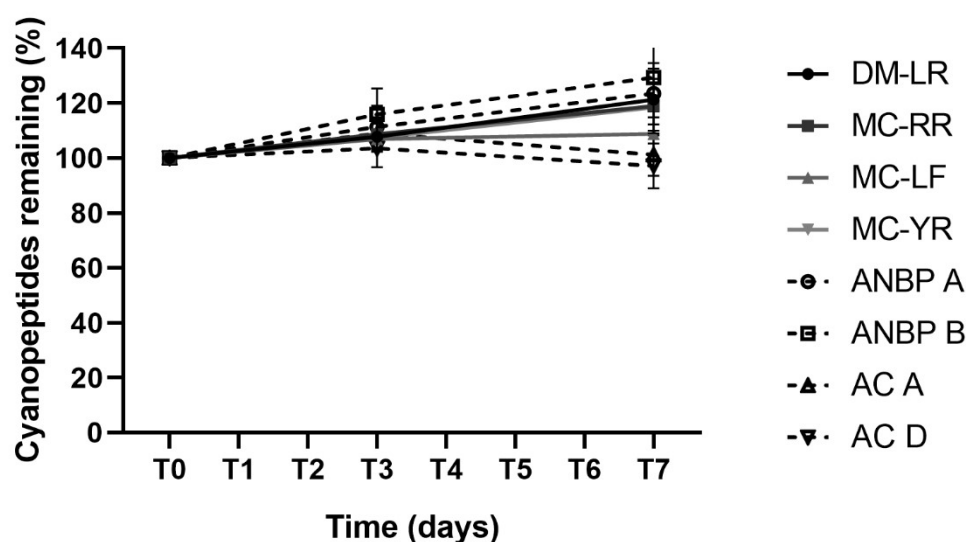

**Figure S1.** Negative control without *Paucibacter toxinivorans* culture for cyanopeptides degradation into mix condition. The data are expressed in percentage of remained concentration of peptides considering mean and standard deviation ( $n = 3$ ).

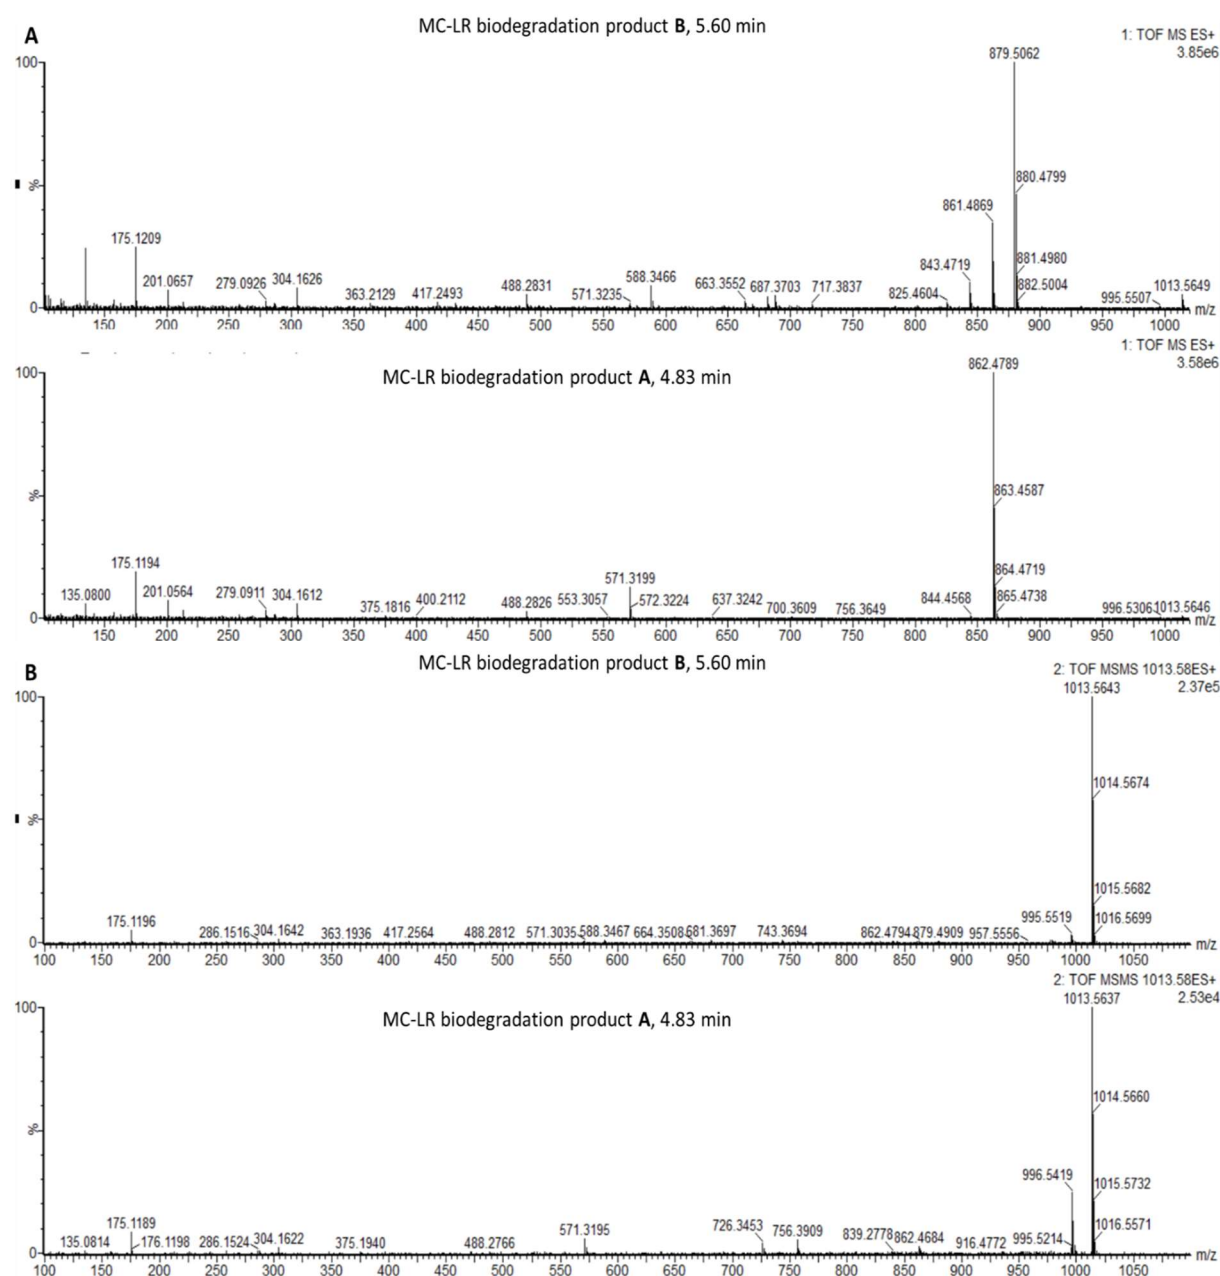

**Figure S2.** (A) Bottom: MS<sup>E</sup> spectrum of biodegradation product A at 4.83 min identified in the *Paucibacter toxinivorans* 2C20 culture sample in pure MC-LR conditions at day 7, Top: MS<sup>E</sup> spectrum of biodegradation product B at 5.60 min identified in the *Paucibacter toxinivorans* 2C20 culture sample in pure MC-LR conditions at day 7. (B) Bottom: MS/MS spectrum of *m/z* 862.4789, Top: MS/MS spectrum of *m/z* 879.5062.

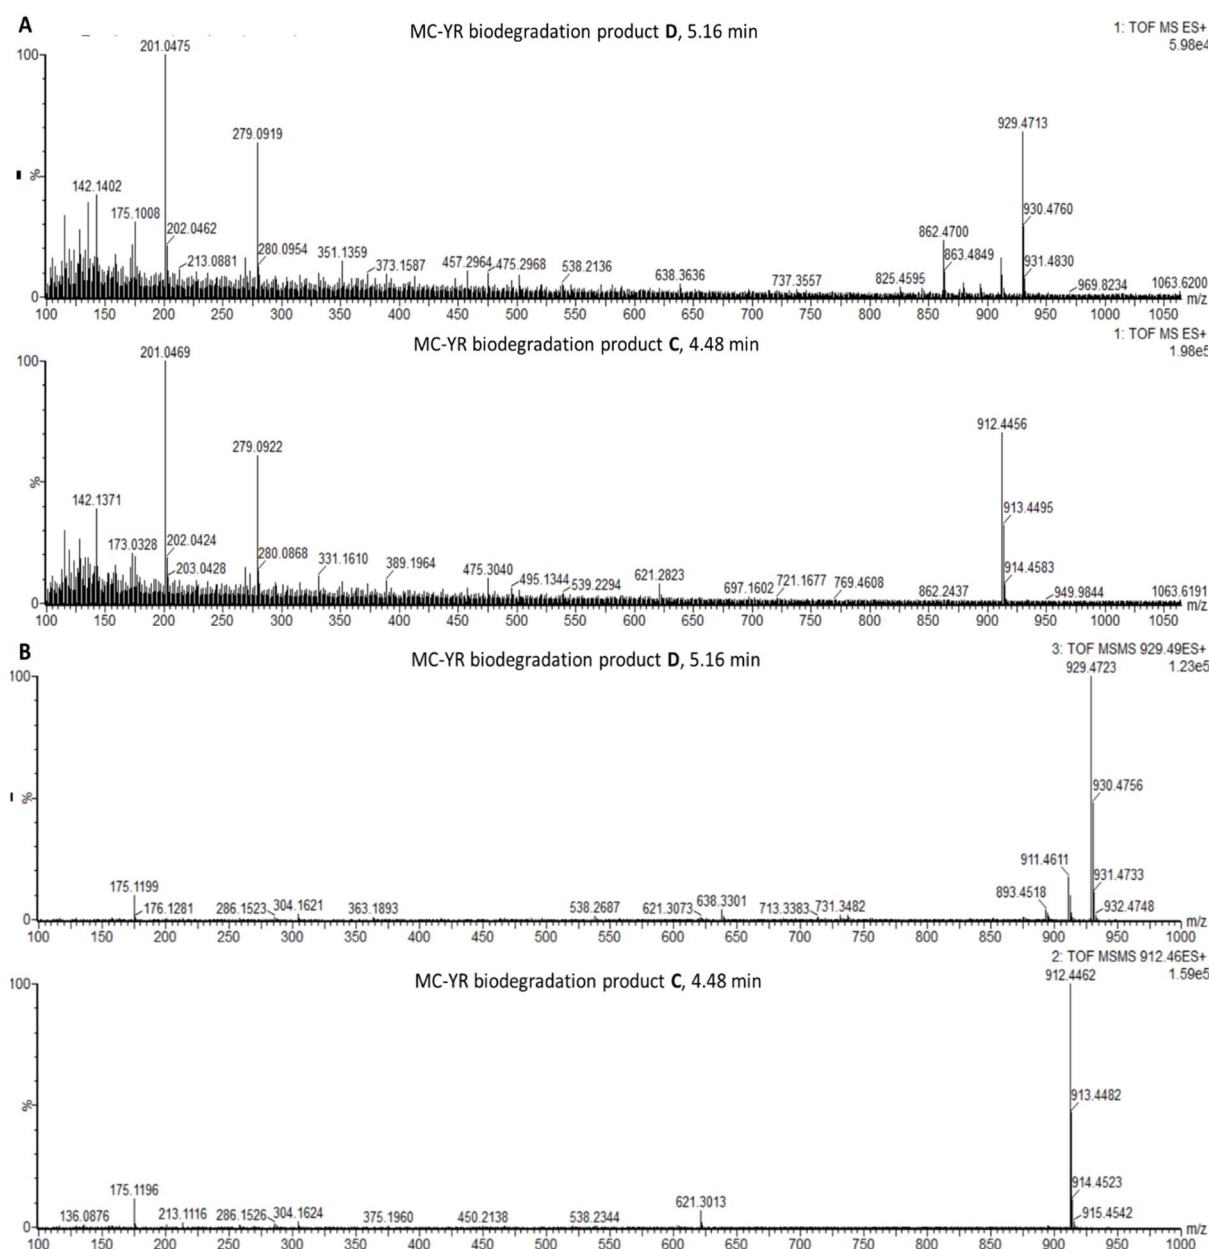

**Figure S3.** (A) Bottom: MS<sup>E</sup> spectrum of biodegradation product C at 4.48 min identified in the *Paucibacter toxinivorans* 2C20 culture sample in peptide mixture condition at day 7, Top: MS<sup>E</sup> spectrum of biodegradation product C at 5.16 min identified in the *Paucibacter toxinivorans* 2C20 culture sample in peptide mixture condition at day 7. (B) Bottom: MS/MS spectrum of *m/z* 912.4462, Top: MS/MS spectrum of *m/z* 929.4723.

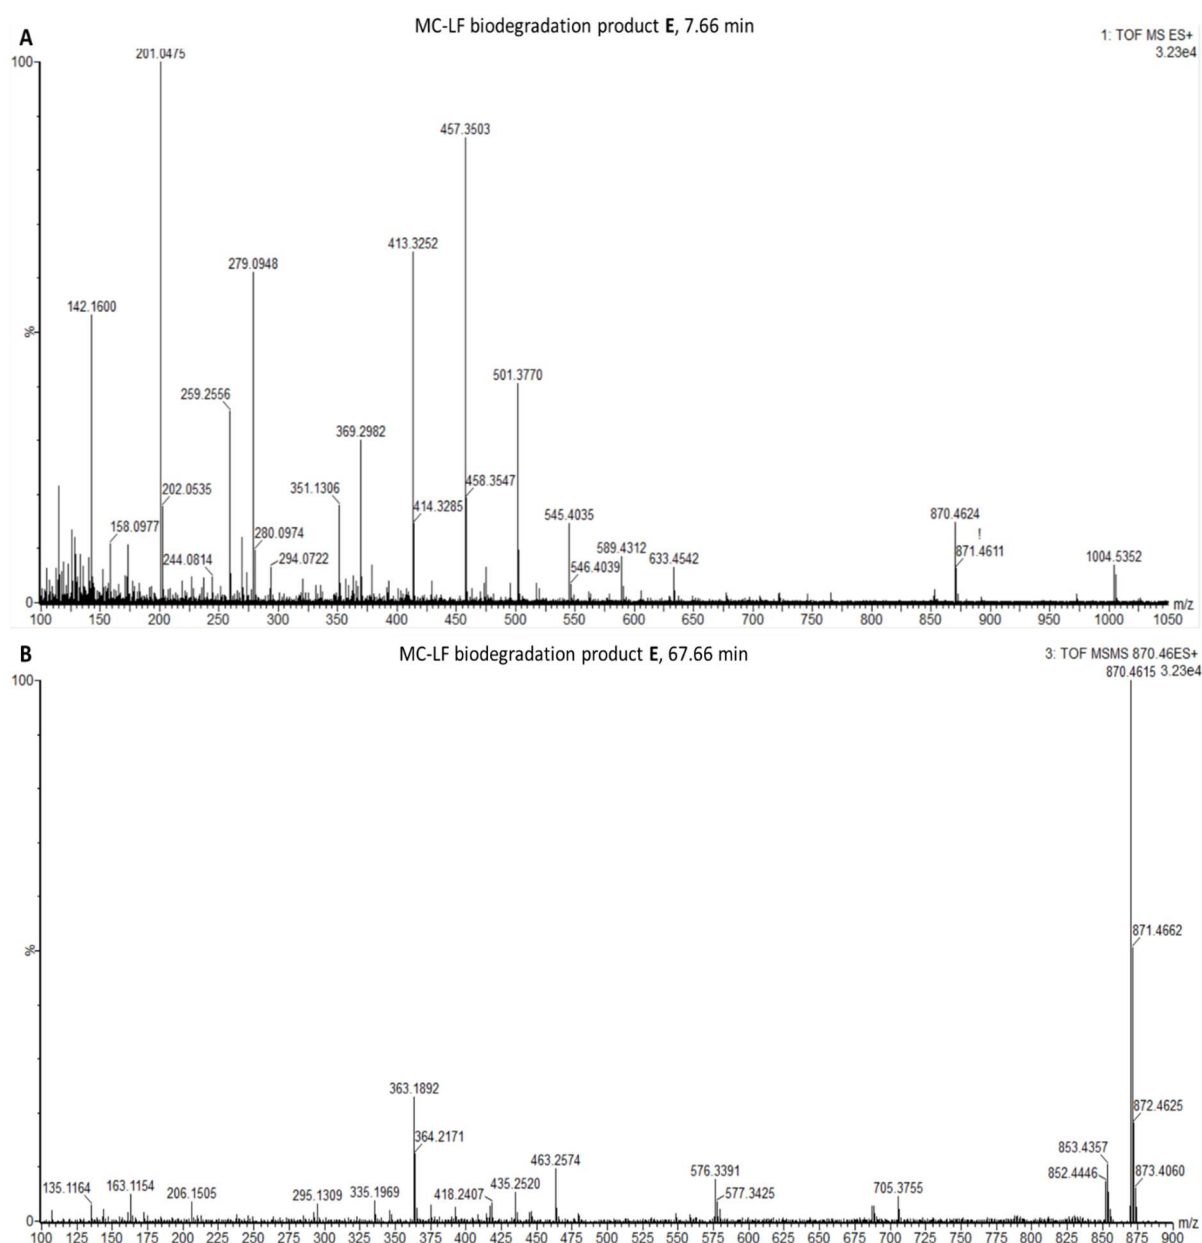

**Figure S4.** (A) MS<sup>E</sup> spectrum of biodegradation product E at 7.66 min identified in the *Paucibacter toxinivorans* 2C20 culture sample in peptide mixture condition at day 7, (B) MS/MS spectrum of m/z 870.4624.

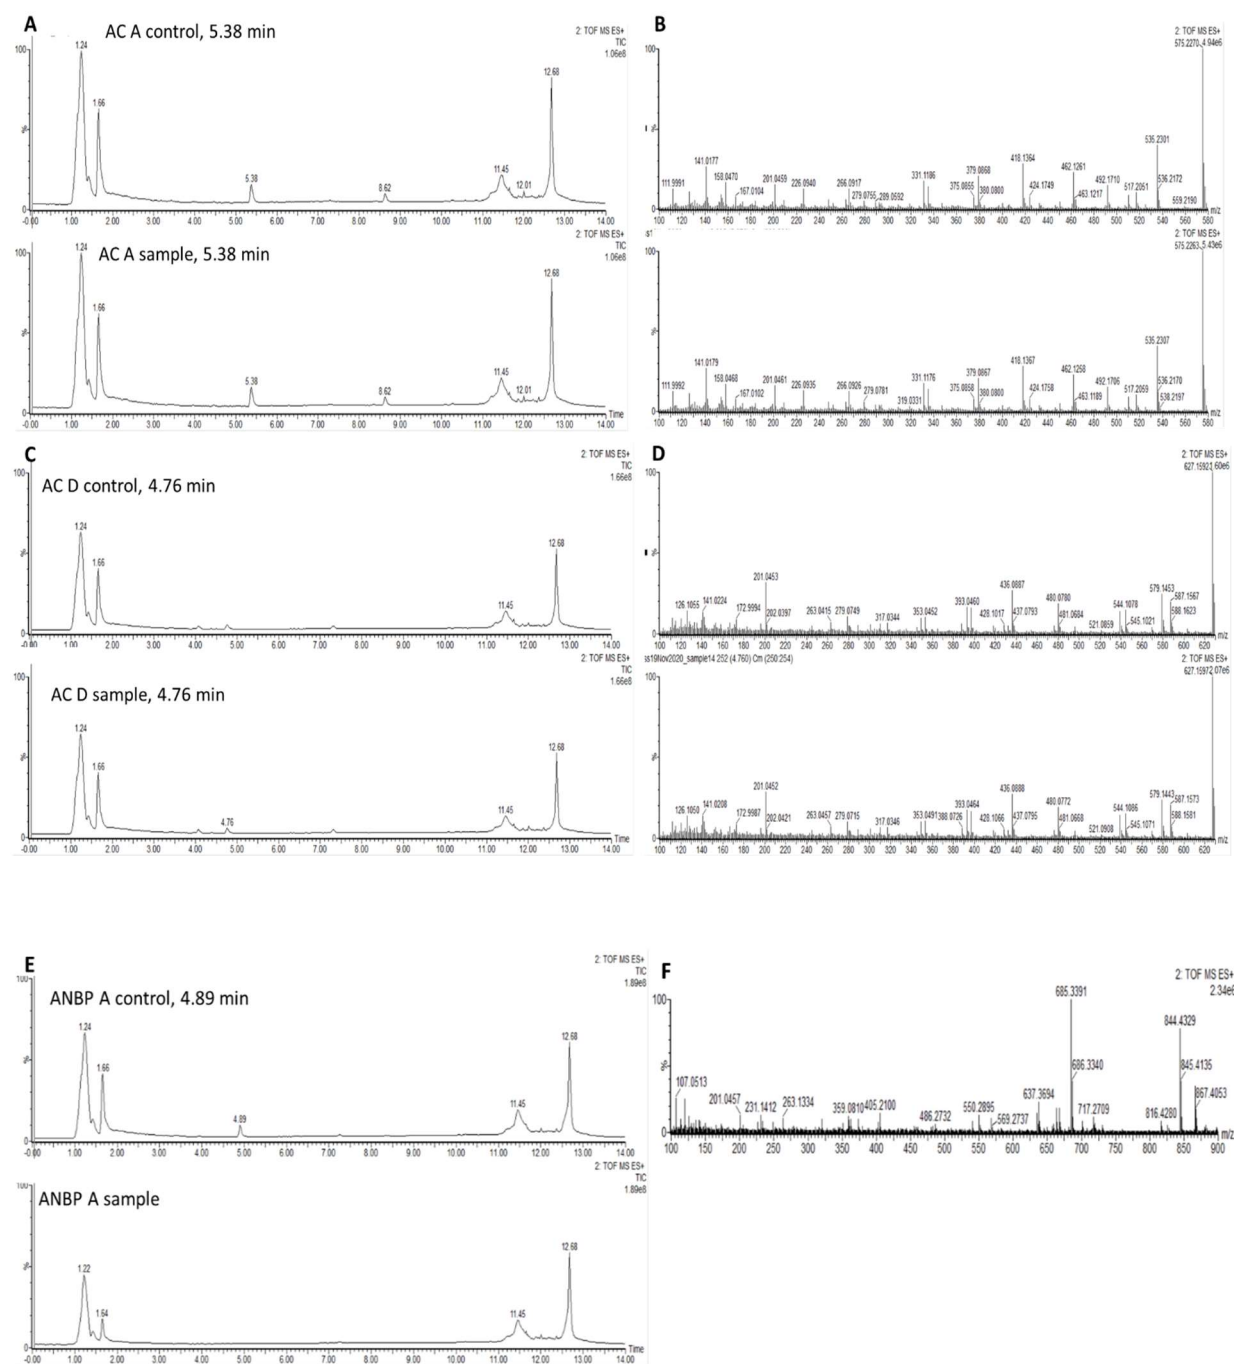

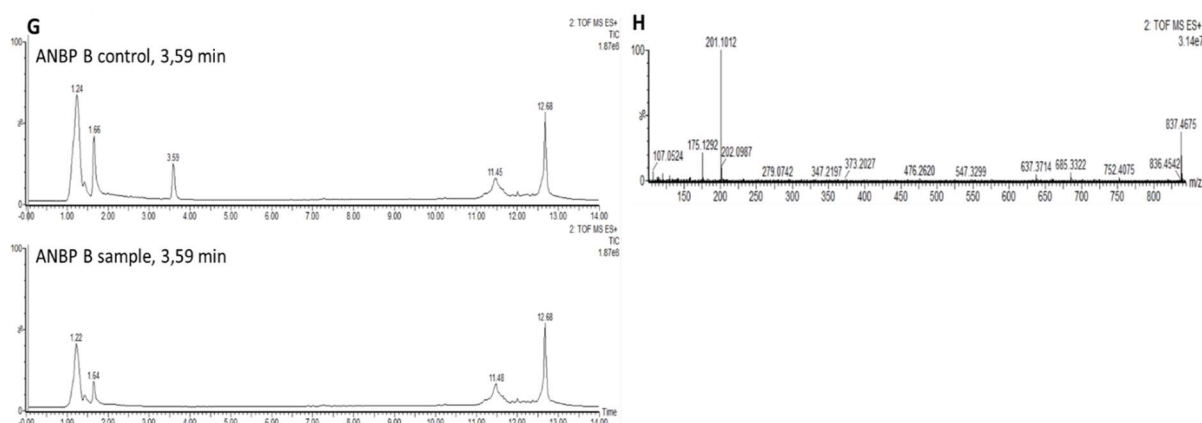

**Figure S5.** (A) UPLC chromatogram of the control (top) and of the *Paucibacter toxinivorans* 2C20 culture at day 3 (bottom), AC-A at 5.38 min (B) MS<sup>E</sup> spectrum of AC-A in the control (top) and in the *Paucibacter toxinivorans* 2C20 culture at day 3 (bottom). (C) UPLC chromatogram of the control (top) and of the *Paucibacter toxinivorans* 2C20 culture at day 3 (bottom), AC-D at 4.76 min (D) MS<sup>E</sup> spectrum of AC-D in the control (top) and in the *Paucibacter toxinivorans* 2C20 culture at day 3 (bottom). (E) UPLC chromatogram of the control (top) and of the *Paucibacter toxinivorans* 2C20 culture at day 3 (bottom), ANBP-A at 4.89 min (F) MS<sup>E</sup> spectrum of ANBP-A in the control at day 3. No ANBP-A was observed in in the *Paucibacter toxinivorans* 2C20 culture at day 3. (G) UPLC chromatogram of the control (top) and of the *Paucibacter toxinivorans* 2C20 culture at day 3 (bottom), ANBP-B at 3.59 min (H) MS<sup>E</sup> spectrum of ANBP-A in the control at day 3. No ANBP-B was observed in in the *Paucibacter toxinivorans* 2C20 culture at day 3.

**Table S1.** Exponential decay rate ( $d^{-1}$ ) and half-life for each cyanopeptide in different condition (purified, mix, and with *M. aeruginosa* 7806 crude extract) by *Paucibacter toxinivorans* 2C20 strain. The decay rates are represented by incubation time according to the first three days, the last four days and over the total 7 days.

| Decay rate of cyanopeptides |              |              |              | Half-Life<br>(T <sub>1/2</sub> ) |
|-----------------------------|--------------|--------------|--------------|----------------------------------|
| Bi-phasic step              |              | Over 7 days  |              |                                  |
| First 3 days                | Last 4 days  |              |              |                                  |
| Purified cyanopeptide       |              |              |              |                                  |
| MC-LR                       | 0.109 ± 0.01 | 0.394 ± 0.02 | 0.272 ± 0.01 | 4.5                              |
| DM-LR                       | 0.203 ± 0.01 | 0.719 ± 0.01 | 0.498 ± 0.01 | 3.5                              |
| MC-RR                       | 0.240 ± 0.04 | 0.435 ± 0.09 | 0.351 ± 0.07 | 3.0                              |
| MC-LF                       | 0.233 ± 0.02 | 0.478 ± 0.01 | 0.372 ± 0.01 | 3.5                              |
| MC-YR                       | 0.177 ± 0.02 | 0.819 ± 0.09 | 0.544 ± 0.44 | 3.5                              |
| ANBP-A                      | 2.363 ± 0.01 | **           | **           | 1.5                              |
| ANBP-B                      | 2.350 ± 0.04 | **           | **           | 1.5                              |
| AC-A                        | 1.643 ± 0.01 | **           | **           | 1.5                              |
| AC-D                        | 2.607 ± 0.04 | **           | **           | 1.5                              |
| Cyanopeptides (mix)         |              |              |              |                                  |
| MC-LR +<br>peptide<br>mix   | 0.09 ± 0.05  | 0.215 ± 0.04 | 0.162 ± 0.01 | 5.5                              |
| DM-LR in<br>mix             | 0.088 ± 0.02 | 0.209 ± 0.01 | 0.157 ± 0.01 | 5.5                              |
| MC-RR in<br>mix             | 0.068 ± 0.02 | 0.100 ± 0.01 | 0.086 ± 0.01 | 7.0                              |
| MC-LF in<br>mix             | 0.022 ± 0.02 | 0.077 ± 0.01 | 0.054 ± 0.01 | >7.0                             |
| MC-YR in<br>mix             | 0.110 ± 0.02 | 0.236 ± 0.02 | 0.182 ± 0.01 | 5.0                              |
| ANBP-A in<br>mix            | *            | *            | *            | *                                |
| ANBP-B in<br>mix            | *            | *            | *            | *                                |
| AC-A in<br>mix              | *            | *            | *            | *                                |

|                                                         |             |    |    |     |
|---------------------------------------------------------|-------------|----|----|-----|
| AC-D in<br>mix                                          | *           | *  | *  | *   |
| MC-LR +<br><i>M.aeruginosa</i> 7806<br>crude<br>extract | 2.33 ± 0.01 | ** | ** | 1.5 |

\*respective cyanopeptide was not detected at any time even time 0, which makes an unattainable decay rate calculation. \*\*respective cyanopeptide was completely degraded over 3rd day, so there was no an exactly decay rate for this interval.



**Table S2.** Chemical information of all peptides tested here, considering their chemical structure, molecular formula, molecular weight, selected reaction monitoring (SRM) transitions and retention time in UPLC/MS system.

| Compounds                    | Chemical Structure                                                                   | Molecular Formula                                               | Molecular Weight (g/mol) | MRM Transitions ([M+H] <sup>+</sup> or [M+2H] <sup>2+</sup> ) | Retention Time |
|------------------------------|--------------------------------------------------------------------------------------|-----------------------------------------------------------------|--------------------------|---------------------------------------------------------------|----------------|
| Microcystin-LR (MC-LR)       | 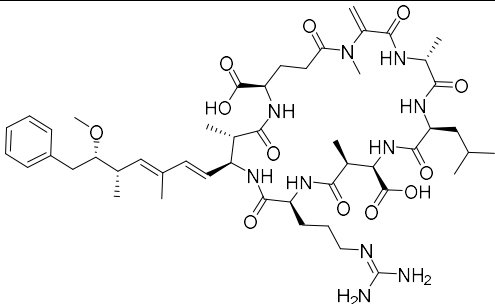   | C <sub>49</sub> H <sub>74</sub> N <sub>10</sub> O <sub>12</sub> | 995.2                    | 995.6>135.239*                                                | 2.78           |
| [Asp3]Microcystin-LR (DM-LR) |   | C <sub>48</sub> H <sub>72</sub> N <sub>10</sub> O <sub>12</sub> | 981.1                    | 981.596>135.239*                                              | 2.81           |
| Microcystin-RR (MC-RR)       |  | C <sub>49</sub> H <sub>75</sub> N <sub>13</sub> O <sub>12</sub> | 1038.2                   | 520>135.24**                                                  | 1.83           |

|                           |                                                                                     |                            |        |                   |      |
|---------------------------|-------------------------------------------------------------------------------------|----------------------------|--------|-------------------|------|
| Microcystin-LF (MC-LF)    | 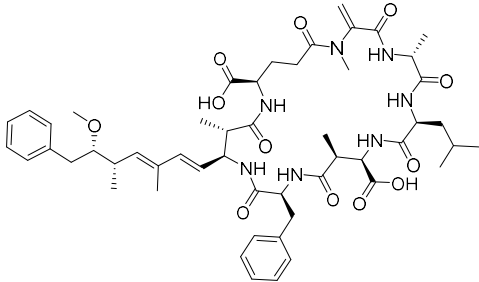  | $C_{52}H_{71}N_7O_{12}$    | 986.2  | 986.596>135.245*  | 4.40 |
| Microcystin-YR (MC-YR)    |   | $C_{52}H_{72}N_{10}O_{13}$ | 1045.2 | 1045.568>135.303* | 2.57 |
| Anabaenopeptin A (ANPB-A) |  | $C_{44}H_{57}N_7O_{10}$    | 843.9  | 844.48>83.96*     | 1.85 |

|                              |                                                                                     |                         |       |                   |      |
|------------------------------|-------------------------------------------------------------------------------------|-------------------------|-------|-------------------|------|
| Anabaenopeptin B<br>(ANBP-B) | 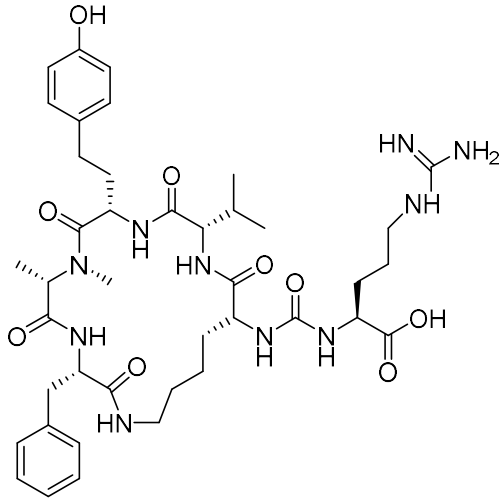  | $C_{41}H_{60}N_{10}O_9$ | 837   | 837.521>201.021*  | 1.56 |
| Aerucyclamide A<br>(AC-A)    |   | $C_{24}H_{34}N_6O_4S_2$ | 534.7 | 535..287>140.907* | 2.58 |
| Aerucyclamide D<br>(AC-D)    |  | $C_{26}H_{30}N_6O_4S_3$ | 586.8 | 587.13>539.125*   | 2.32 |

|                                  |                                                                                    |                             |        |                    |      |
|----------------------------------|------------------------------------------------------------------------------------|-----------------------------|--------|--------------------|------|
| Cyclosporine A<br>(CYCL)         | 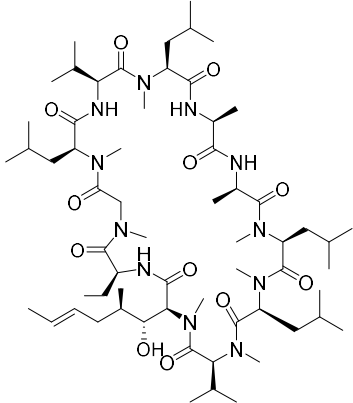  | $C_{62}H_{111}N_{11}O_{12}$ | 1202.6 | 1224.841>1112.809* | 3.57 |
| [Glu1]Fibrinopeptide-<br>B (FIB) |  | $C_{66}H_{95}N_{19}O_{26}$  | 1570.6 | 786.075>119.95**   | 1.25 |
| Leucine-Enkephalin<br>(LEU-ENK)  |  | $C_{28}H_{37}N_5O_7$        | 555.6  | 556.313>119.951*   | 1.43 |

|                 |                                                                                   |                               |        |                   |      |
|-----------------|-----------------------------------------------------------------------------------|-------------------------------|--------|-------------------|------|
| Oxytocin (OXYT) | 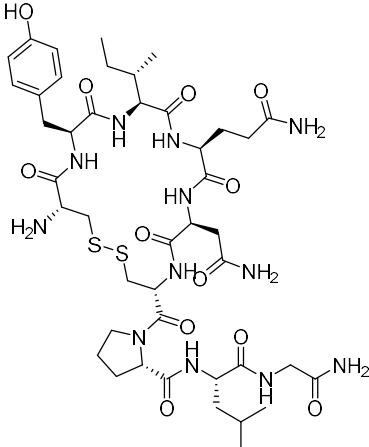 | $C_{43}H_{66}N_{12}O_{12}S_2$ | 1007.2 | 1007.458>723.307* | 1.30 |
|-----------------|-----------------------------------------------------------------------------------|-------------------------------|--------|-------------------|------|

\*dominant ion observed in mass spectrometry analysis when singly protonated or \*\*doubly protonated ion.
